# Supplementary material for: Dynamic interactions of influenza viruses in Hong Kong during 1998-2018
Source: PubMed Central journal article supplement (PMC7316359; doi:10.1371/journal.pcbi.1007989), 2020-06-15

(A) Susceptibility v. infection rate

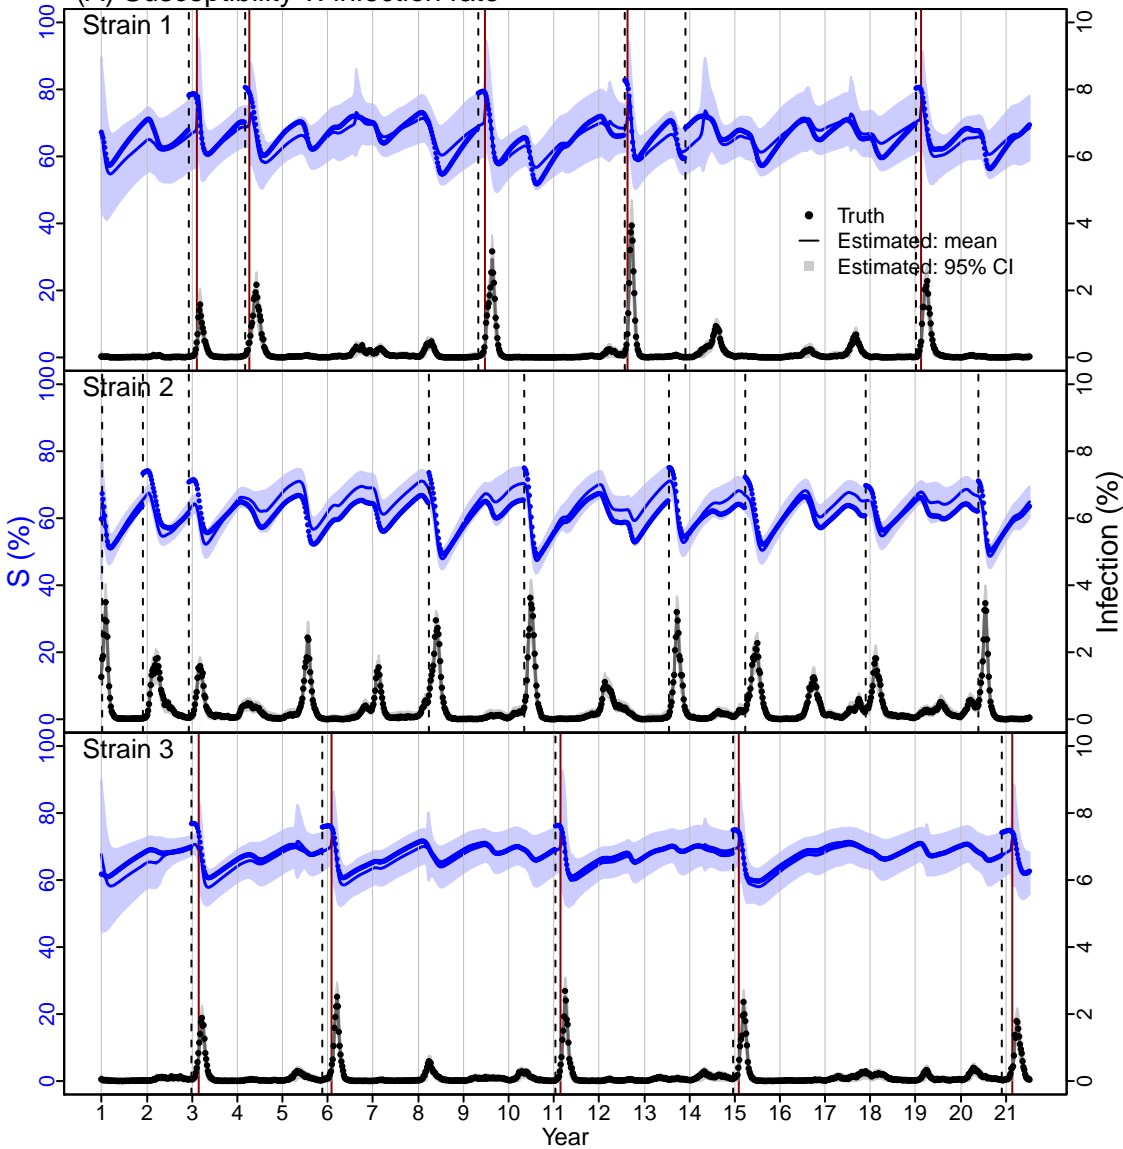(B)  $R_0$  v. infection rate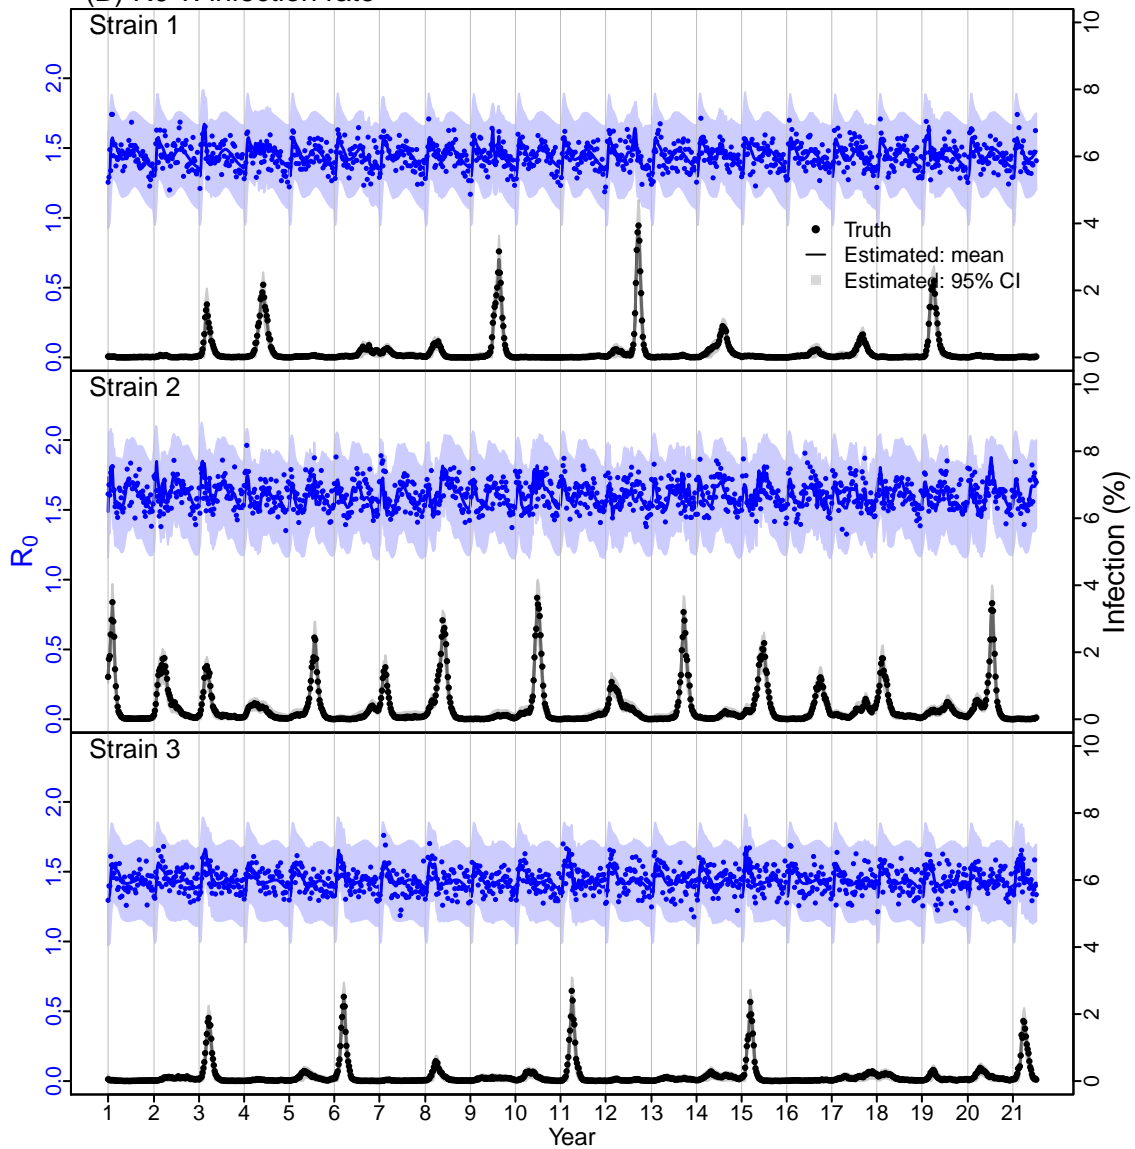

(C) Infectious period

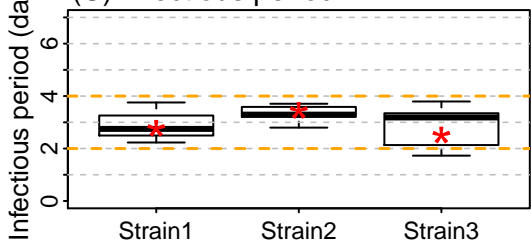

(D) Immunity period

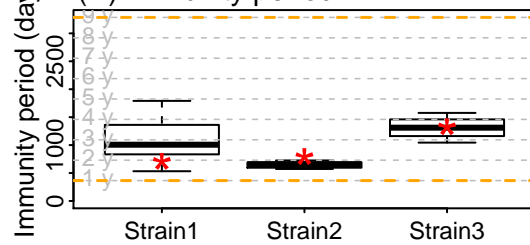

(E) Strength of cross-immunity

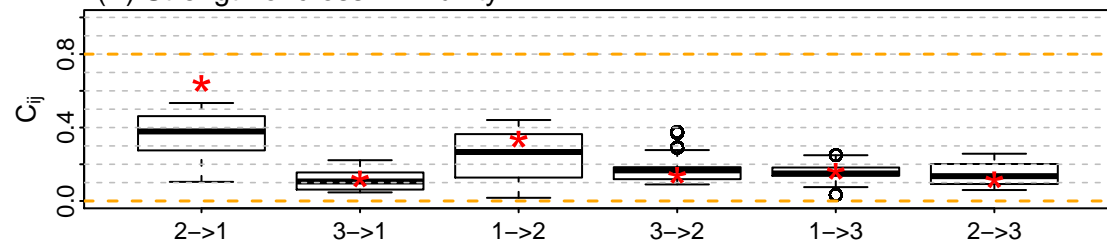

Supplement: pcbi.1007989.s007.pdf [file pcbi.1007989.s007.pdf]
