# Supplementary material for: Dynamic interactions of influenza viruses in Hong Kong during 1998-2018
Source: PubMed Central journal article supplement (PMC7316359; doi:10.1371/journal.pcbi.1007989), 2020-06-15

**A(H1N1)**

3.9 (95% CI: -162, 103)

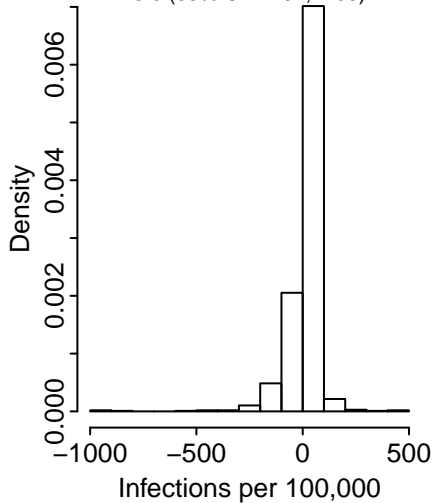**A(H3N2)**

-2.8 (95% CI: -198, 140)

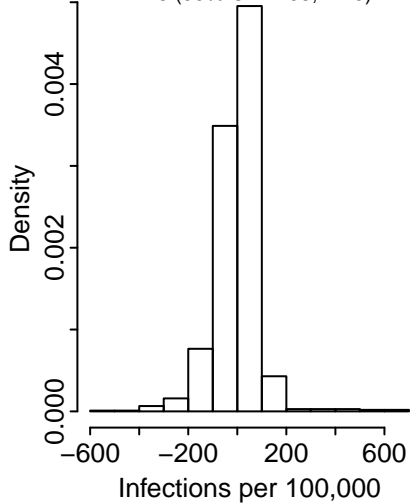**B**

9.3 (95% CI: -131, 113)

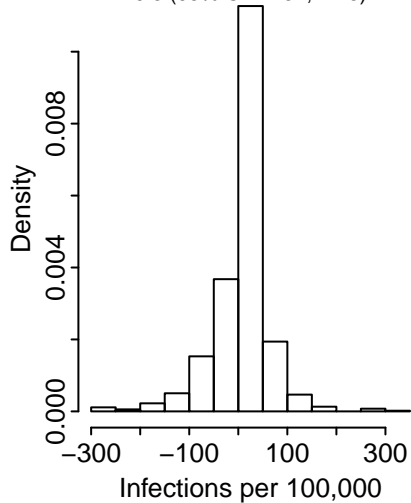

Supplement: pcbi.1007989.s010.pdf [file pcbi.1007989.s010.pdf]
