# Supplementary material for: Dynamic interactions of influenza viruses in Hong Kong during 1998-2018
Source: PubMed Central journal article supplement (PMC7316359; doi:10.1371/journal.pcbi.1007989), 2020-06-15

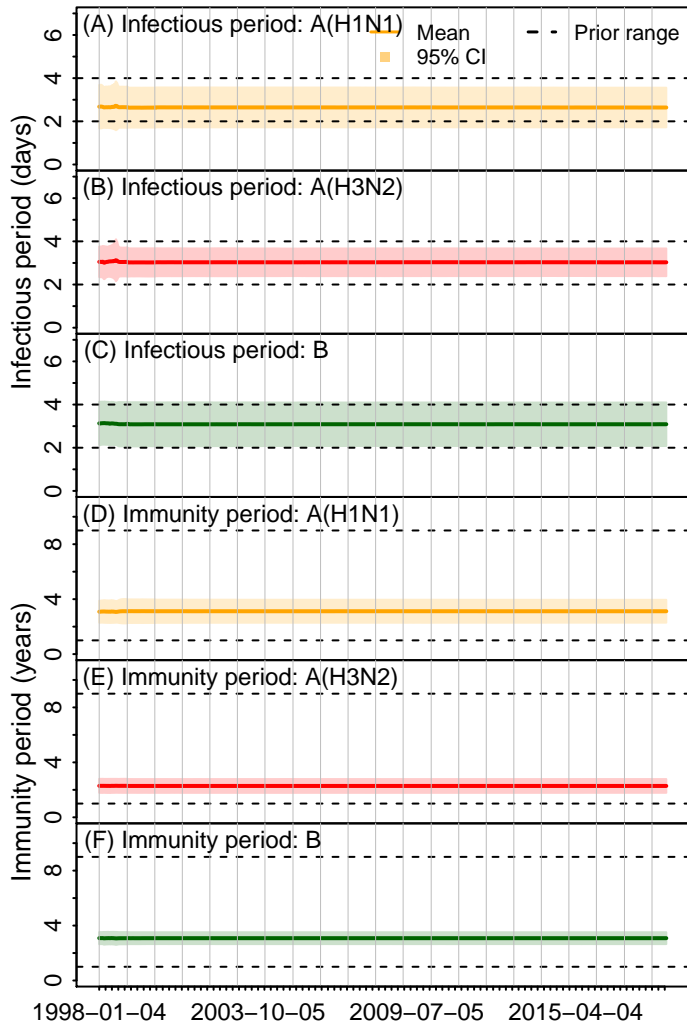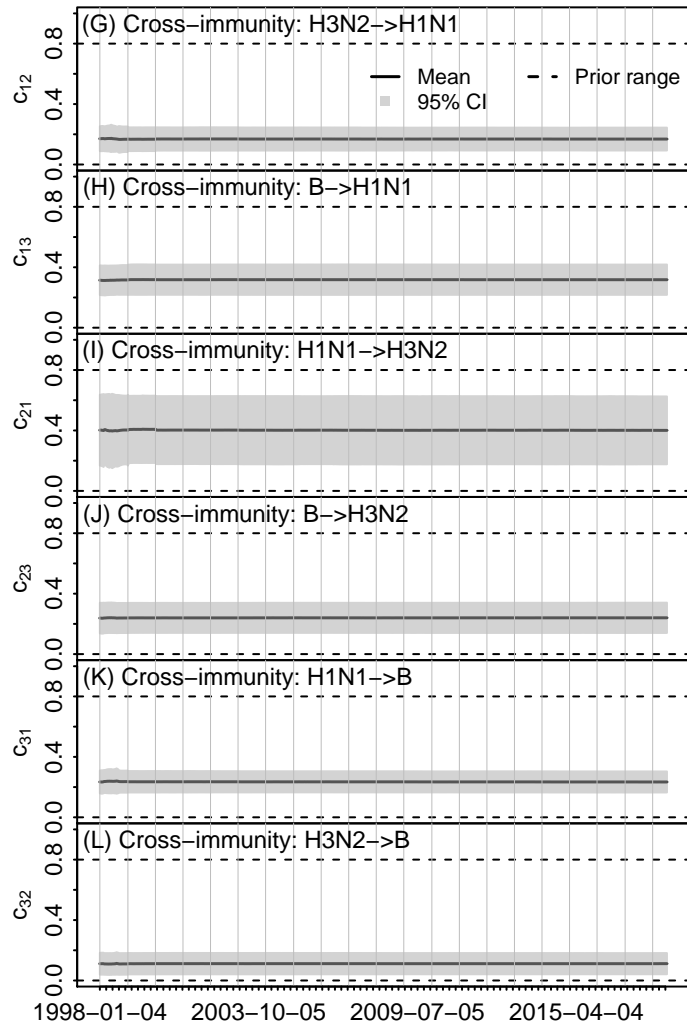

Supplement: pcbi.1007989.s011.pdf [file pcbi.1007989.s011.pdf]
